# Supplementary material for: Incidence and outcomes of uterine rupture among women with prior caesarean section: WHO Multicountry Survey on Maternal and Newborn Health
Source: PubMed Central journal article supplement (PMC5345021; doi:10.1038/srep44093), 2017-03-10
Supplement: srep44093-s1.pdf [file srep44093-s1.pdf]

## **Incidence and outcomes of uterine rupture among women with prior caesarean section: WHO Multicountry Survey on Maternal and Newborn Health**

Kenichiro Motomura<sup>1§</sup>, Togoobaatar Ganchimeg<sup>2§</sup>, Chie Nagata<sup>3§\*</sup>, Erika Ota<sup>4</sup>, Joshua P. Vogel<sup>5</sup>, Ana Pilar Betran<sup>5</sup>, Maria Regina Torloni<sup>6</sup>, Kapila Jayaratne<sup>7</sup>, Seung Chik Jwa<sup>8</sup>, Suneeta Mittal<sup>9</sup>, Zenaida Dy Recidoro<sup>10</sup>, Kenji Matsumoto<sup>1</sup>, Mikiya Fujieda<sup>11</sup>, Idi Nafiu<sup>12</sup>, Khalid Yunis<sup>13</sup>, Zahida Qureshi<sup>14</sup>, Joao Paulo Souza<sup>15</sup>, and Rintaro Mori<sup>16</sup>  
on behalf of the WHO Multicountry Survey on Maternal and Newborn Health Research Network.

<sup>1</sup> Department of Allergy and Clinical Immunology, National Research Institute for Child Health and Development, Tokyo, Japan

<sup>2</sup> Department of Global Health Nursing, Faculty of Medicine, University of Tsukuba, Tsukuba, Japan

<sup>3</sup> Department of Education for Clinical Research, National Center for Child Health and Development, Tokyo, Japan

<sup>4</sup> Global Health Nursing, Graduate School of Nursing Science, St. Luke's International University, Tokyo, Japan

<sup>5</sup> UNDP/UNFPA/UNICEF/WHO/World Bank Special Programme of Research, Development and Research Training in Human Reproduction (HRP), Department of Reproductive Health and Research, World Health Organization, Geneva, Switzerland

<sup>6</sup> Department of Internal Medicine, Evidence Based Healthcare Post-Graduate Programme, São Paulo Federal University, São Paulo, Brazil

<sup>7</sup> Maternal & Child Morbidity & Mortality Unit, Family Health Bureau, Ministry of Health, Colombo, Sri Lanka

<sup>8</sup> Sora no Mori Clinic, Okinawa, Japan

<sup>9</sup> Obstetrics & Gynecology, Fortis Memorial Research Institute, Gurgaon, India

<sup>10</sup> National Center for Disease Prevention and Control, Department of Health, Manila, Philippines

<sup>11</sup> Department of Pediatrics, Kochi Medical School, Kochi University, Kochi, Japan

<sup>12</sup> Université Abdou Moumouni de Niamey, Niamey, Niger

<sup>13</sup> American University of Beirut, Beirut, Lebanon

<sup>14</sup> Obstetrics and Gynaecology, University of Nairobi School of Medicine, Nairobi, Kenya

<sup>15</sup> Department of Social Medicine, Ribeirão Preto Medical School, University of São Paulo, São Paulo, Brazil

<sup>16</sup> Department of Health Policy, National Center for Child Health and Development, Tokyo, Japan

§These authors contributed equally.

\*Corresponding author

Supplementary table S1. Total number of deliveries, number and proportion of women with prior caesarean section among total deliveries, and number and proportion of women with uterine rupture among women with prior caesarean section, by Human Development Index and country

| HDI                     | Country     | Total deliveries | Women with prior CS |      |                 |     |
|-------------------------|-------------|------------------|---------------------|------|-----------------|-----|
|                         |             |                  | Total               |      | Uterine rupture |     |
|                         |             |                  | n                   | %    | n               | %   |
| Very high-HDI countries |             | 17,294           | 2,843               | 16.4 | 8               | 0.3 |
|                         | Japan       | 3,537            | 275                 | 7.8  | 3               | 1.1 |
|                         | Qatar       | 3,950            | 742                 | 18.8 | 1               | 0.1 |
|                         | Argentina   | 9,807            | 1,826               | 18.6 | 4               | 0.2 |
| High-HDI countries      |             | 68,066           | 13,125              | 19.3 | 20              | 0.2 |
|                         | Mexico      | 13,309           | 3,269               | 24.6 | 5               | 0.2 |
|                         | Lebanon     | 4,044            | 809                 | 20.0 | 1               | 0.1 |
|                         | Peru        | 15,285           | 2,731               | 17.9 | 8               | 0.3 |
|                         | Brazil      | 7,058            | 1,331               | 18.9 | 1               | 0.1 |
|                         | Ecuador     | 10,245           | 2,398               | 23.4 | 3               | 0.1 |
|                         | Sri Lanka   | 18,125           | 2,587               | 14.3 | 2               | 0.1 |
| Medium-HDI countries    |             | 104,206          | 11,280              | 10.8 | 39              | 0.4 |
|                         | Jordan      | 1,167            | 251                 | 21.5 | 1               | 0.4 |
|                         | China       | 13,277           | 1,251               | 9.4  | 4               | 0.3 |
|                         | Thailand    | 8,973            | 1,024               | 11.4 | NR              |     |
|                         | Mongolia    | 7,365            | 707                 | 9.6  | 1               | 0.1 |
|                         | Paraguay    | 3,610            | 767                 | 21.3 | 3               | 0.4 |
|                         | Philippines | 10,783           | 1,155               | 10.7 | 4               | 0.4 |
|                         | Vietnam     | 15,437           | 2,214               | 14.3 | 1               | 0.1 |
|                         | Nicaragua   | 6,571            | 864                 | 13.3 | 2               | 0.2 |
|                         | India       | 31,318           | 2,700               | 8.6  | 22              | 0.8 |
|                         | Cambodia    | 4,725            | 176                 | 3.7  | 1               | 0.6 |
|                         | OPT         | 980              | 171                 | 17.4 | NR              |     |
| Low-HDI countries       |             | 125,030          | 10,118              | 8.1  | 103             | 1.0 |
|                         | Kenya       | 20,331           | 2,282               | 11.2 | 19              | 0.8 |
|                         | Pakistan    | 13,175           | 2,588               | 19.7 | 15              | 0.6 |
|                         | Angola      | 10,450           | 581                 | 5.6  | 11              | 1.9 |
|                         | Nigeria     | 12,841           | 949                 | 7.5  | 9               | 1.0 |
|                         | Nepal       | 11,290           | 606                 | 5.4  | 3               | 0.5 |
|                         | Uganda      | 10,923           | 894                 | 8.2  | 15              | 1.7 |
|                         | Afghanistan | 26,148           | 701                 | 2.7  | 3               | 0.4 |
|                         | DRC         | 8,756            | 1,069               | 12.2 | 17              | 1.6 |
|                         | Niger       | 11,116           | 448                 | 4.0  | 11              | 2.5 |
| All countries           |             | 314,623          | 37,366              | 11.9 | 170             | 0.5 |

CS, caesarean section; DRC, Democratic Republic of Congo; HDI, Human Development Index; NR, not reported; OPT, Occupied Palestinian Territory.

Supplementary Table S2. Number of women with prior caesarean section and women who had uterine rupture in the current pregnancy stratified by number of prior caesarean sections in participating countries

| HDI groups / countries | Women with prior CS |            |      |             |      | Uterine rupture |     |            |     |             |     |
|------------------------|---------------------|------------|------|-------------|------|-----------------|-----|------------|-----|-------------|-----|
|                        | Total               | 1 prior CS |      | ≥2 prior CS |      | Total           |     | 1 prior CS |     | ≥2 prior CS |     |
|                        | n                   | n          | %    | n           | %    | n               | %   | n          | %   | n           | %   |
| Very high HDI          | 2,843               | 2,072      | 72.9 | 771         | 27.1 | 8               | 0.3 | 5          | 0.2 | 3           | 0.4 |
| Japan                  | 275                 | 233        | 84.7 | 42          | 15.3 | 3               | 1.1 | 2          | 0.9 | 1           | 2.4 |
| Qatar                  | 742                 | 510        | 68.7 | 232         | 31.3 | 1               | 0.1 | 1          | 0.2 | NR          |     |
| Argentina              | 1,826               | 1,329      | 72.8 | 497         | 27.2 | 4               | 0.2 | 2          | 0.2 | 2           | 0.4 |
| High HDI               | 13,125              | 9,772      | 74.5 | 3353        | 25.5 | 20              | 0.2 | 16         | 0.2 | 4           | 0.1 |
| Mexico                 | 3,269               | 2,477      | 75.8 | 792         | 24.2 | 5               | 0.2 | 5          | 0.2 | NR          | 0.0 |
| Lebanon                | 809                 | 502        | 62.1 | 307         | 37.9 | 1               | 0.1 | 1          | 0.2 | NR          | 0.0 |
| Peru                   | 2,731               | 2,104      | 77.0 | 627         | 23.0 | 8               | 0.3 | 5          | 0.2 | 3           | 0.5 |
| Brazil                 | 1,331               | 1,040      | 78.1 | 291         | 21.9 | 1               | 0.1 | NR         | 0.0 | 1           | 0.3 |
| Ecuador                | 2,398               | 1,559      | 65.0 | 839         | 35.0 | 3               | 0.1 | 3          | 0.2 | NR          | 0.0 |
| Sri Lanka              | 2,587               | 2,090      | 80.8 | 497         | 19.2 | 2               | 0.1 | 2          | 0.1 | NR          | 0.0 |
| Medium HDI             | 11,280              | 9,531      | 84.5 | 1,749       | 15.5 | 39              | 0.3 | 31         | 0.3 | 8           | 0.5 |
| Jordan                 | 251                 | 147        | 58.6 | 104         | 41.4 | 1               | 0.4 | 1          | 0.7 | NR          | 0.0 |
| China                  | 1,251               | 1,215      | 97.1 | 36          | 2.9  | 4               | 0.3 | 3          | 0.2 | 1           | 2.8 |
| Thailand               | 1,024               | 902        | 88.1 | 122         | 11.9 | NR              |     | NR         |     | NR          |     |
| Mongolia               | 707                 | 564        | 79.8 | 143         | 20.2 | 1               | 0.1 | 1          | 0.2 | NR          |     |
| OPT                    | 171                 | 104        | 60.8 | 67          | 39.2 | NR              |     | NR         |     | NR          |     |
| Paraguay               | 767                 | 530        | 69.1 | 237         | 30.9 | 3               | 0.4 | 2          | 0.4 | 1           | 0.4 |
| Philippines            | 1,155               | 844        | 73.1 | 311         | 26.9 | 4               | 0.3 | 4          | 0.5 | NR          |     |
| Vietnam                | 2,214               | 2,046      | 92.4 | 168         | 7.6  | 1               | 0.0 | 1          | 0.0 | NR          |     |
| Nicaragua              | 864                 | 713        | 82.5 | 151         | 17.5 | 2               | 0.2 | 1          | 0.1 | 1           | 0.7 |
| India                  | 2,700               | 2,303      | 85.3 | 397         | 14.7 | 22              | 0.8 | 17         | 0.7 | 5           | 1.3 |
| Cambodia               | 176                 | 163        | 92.6 | 13          | 7.4  | 1               | 0.6 | 1          | 0.6 | NR          |     |
| Low HDI                | 10,118              | 7,388      | 73.0 | 2,730       | 27.0 | 103             | 1.0 | 74         | 1.0 | 29          | 1.1 |
| Kenya                  | 2,282               | 1,781      | 78.0 | 501         | 22.0 | 19              | 0.8 | 15         | 0.8 | 4           | 0.8 |
| Pakistan               | 2,588               | 1,676      | 64.8 | 912         | 35.2 | 15              | 0.6 | 7          | 0.4 | 8           | 0.9 |
| Angola                 | 581                 | 465        | 80.0 | 116         | 20.0 | 11              | 1.9 | 9          | 1.9 | 2           | 1.7 |
| Nigeria                | 949                 | 702        | 74.0 | 247         | 26.0 | 9               | 0.9 | 8          | 1.1 | 1           | 0.4 |
| Nepal                  | 606                 | 554        | 91.4 | 52          | 8.6  | 3               | 0.5 | 3          | 0.5 | NR          |     |
| Uganda                 | 894                 | 611        | 68.3 | 283         | 31.7 | 15              | 1.7 | 11         | 1.8 | 4           | 1.4 |
| Afghanistan            | 701                 | 536        | 76.5 | 165         | 23.5 | 3               | 0.4 | 2          | 0.4 | 1           | 0.6 |
| DRC                    | 1,069               | 710        | 66.4 | 359         | 33.6 | 17              | 1.6 | 11         | 1.5 | 6           | 1.7 |
| Niger                  | 448                 | 353        | 78.8 | 95          | 21.2 | 11              | 2.5 | 8          | 2.3 | 3           | 3.2 |
| All regions            | 37,366              | 28,763     | 77.0 | 8,603       | 23.0 | 170             | 0.5 | 126        | 0.4 | 44          | 0.5 |

CS, caesarean section; DRC, Democratic Republic of Congo; HDI, Human Development Index; NR, not reported; OPT, Occupied Palestinian Territory.

Supplementary Table S3. Total number of women with prior caesarean section and proportions of onset of labour and mode of delivery by Human Development Index and country

| HDI                     | Country     | Women with prior CS (n) | Onset of labour (%) |         |            |         | Mode of delivery (%) |      |            |
|-------------------------|-------------|-------------------------|---------------------|---------|------------|---------|----------------------|------|------------|
|                         |             |                         | Spontaneous         | Induced | Pre-labour | Missing | Vaginal              | CS   | Laparotomy |
| Very high-HDI countries |             | 2,843                   | 39.7                | 3.1     | 57.1       | 0.1     | 23.4                 | 76.5 | 0.1        |
|                         | Japan       | 275                     | 13.5                | 0.7     | 85.8       | 0.0     | 8.0                  | 92.0 | 0.0        |
|                         | Qatar       | 742                     | 48.3                | 2.6     | 49.2       | 0.0     | 36.4                 | 63.6 | 0.0        |
|                         | Argentina   | 1,826                   | 40.1                | 3.7     | 55.9       | 0.2     | 20.5                 | 79.4 | 0.1        |
| High-HDI countries      |             | 13,125                  | 45.9                | 9.5     | 44.5       | 0.1     | 16.4                 | 83.5 | 0.1        |
|                         | Mexico      | 3,269                   | 59.5                | 9.8     | 30.5       | 0.2     | 20.1                 | 79.9 | 0.0        |
|                         | Lebanon     | 809                     | 26.2                | 9.6     | 64.2       | 0.0     | 4.8                  | 95.2 | 0.0        |
|                         | Peru        | 2,731                   | 51.2                | 1.6     | 47.3       | 0.0     | 22.1                 | 77.7 | 0.2        |
|                         | Brazil      | 1,331                   | 25.7                | 19.5    | 54.6       | 0.2     | 23.7                 | 76.3 | 0.0        |
|                         | Ecuador     | 2,398                   | 68.6                | 13.8    | 17.4       | 0.3     | 9.7                  | 90.3 | 0.0        |
|                         | Sri Lanka   | 2,587                   | 18.7                | 8.4     | 72.9       | 0.0     | 12.0                 | 88.0 | 0.0        |
| Medium-HDI countries    |             | 11,280                  | 52.1                | 4.2     | 43.6       | 0.0     | 12.3                 | 87.7 | 0.1        |
|                         | Jordan      | 251                     | 23.9                | 1.2     | 74.9       | 0.0     | 21.5                 | 78.5 | 0.0        |
|                         | China       | 1,251                   | 30.5                | 1.0     | 68.4       | 0.0     | 5.3                  | 94.6 | 0.1        |
|                         | Thailand    | 1,024                   | 36.5                | 2.6     | 60.8       | 0.0     | 0.8                  | 99.2 | 0.0        |
|                         | Mongolia    | 707                     | 18.8                | 1.6     | 79.5       | 0.1     | 3.7                  | 96.3 | 0.0        |
|                         | Paraguay    | 767                     | 60.4                | 1.2     | 38.5       | 0.0     | 12.4                 | 87.6 | 0.0        |
|                         | Philippines | 1,155                   | 26.5                | 0.6     | 72.9       | 0.0     | 14.2                 | 85.7 | 0.1        |
|                         | Viet Nam    | 2,214                   | 86.9                | 0.8     | 12.3       | 0.1     | 5.9                  | 94.0 | 0.1        |
|                         | Nicaragua   | 864                     | 35.8                | 23.0    | 41.2       | 0.0     | 5.3                  | 94.6 | 0.1        |
|                         | India       | 2,700                   | 63.7                | 6.7     | 29.6       | 0.0     | 26.1                 | 73.8 | 0.1        |
|                         | Cambodia    | 176                     | 80.7                | 0.0     | 19.3       | 0.0     | 26.7                 | 73.3 | 0.0        |
|                         | OPT         | 171                     | 40.9                | 2.9     | 56.1       | 0.0     | 23.4                 | 76.6 | 0.0        |
| Low-HDI countries       |             | 10,118                  | 59.6                | 3.3     | 36.3       | 0.9     | 26.5                 | 73.3 | 0.2        |
|                         | Kenya       | 2,282                   | 65.7                | 4.7     | 29.7       | 0.0     | 25.2                 | 74.7 | 0.0        |
|                         | Pakistan    | 2,588                   | 43.4                | 2.7     | 50.4       | 3.4     | 18.8                 | 81.0 | 0.2        |
|                         | Angola      | 581                     | 76.9                | 3.3     | 19.8       | 0.0     | 36.3                 | 63.0 | 0.7        |
|                         | Nigeria     | 949                     | 41.5                | 2.7     | 55.7       | 0.0     | 21.0                 | 78.9 | 0.1        |
|                         | Nepal       | 606                     | 52.6                | 1.8     | 45.5       | 0.0     | 15.2                 | 84.5 | 0.3        |
|                         | Uganda      | 894                     | 78.9                | 1.5     | 19.6       | 0.1     | 29.4                 | 69.8 | 0.8        |
|                         | Afghanistan | 701                     | 38.7                | 4.8     | 56.5       | 0.0     | 41.5                 | 58.5 | 0.0        |
|                         | DRC         | 1,069                   | 85.3                | 3.5     | 10.9       | 0.3     | 34.5                 | 65.5 | 0.0        |
|                         | Niger       | 448                     | 79.5                | 2.9     | 17.4       | 0.2     | 42.0                 | 57.6 | 0.5        |
| All countries           |             | 37,366                  | 51.0                | 5.7     | 43.0       | 0.3     | 18.4                 | 81.5 | 0.1        |

CS, caesarean section; DRC, Democratic Republic of Congo; HDI, Human Development Index; NR, not reported; OPT, Occupied Palestinian Territory

Supplementary Table S4. Adverse maternal and perinatal outcomes in women with prior CS who had uterine rupture in the current pregnancy in participating countries

| HDI groups / countries | All women |     |                 |     | No uterine rupture |     |                 |     | Uterine rupture |       |                 |       |
|------------------------|-----------|-----|-----------------|-----|--------------------|-----|-----------------|-----|-----------------|-------|-----------------|-------|
|                        | SMO       |     | Perinatal death |     | SMO                |     | Perinatal death |     | SMO             |       | Perinatal death |       |
|                        | n         | %   | n               | %   | n                  | %   | n               | %   | n               | %     | n               | %     |
| Very High HDI          | 30        | 1.1 | 21              | 0.7 | 27                 | 1.0 | 19              | 0.7 | 3               | 37.5  | 2               | 25.0  |
| Japan                  | 6         | 2.2 | NR              |     | 4                  | 1.5 | NR              |     | 2               | 66.7  | NR              |       |
| Qatar                  | 4         | 0.5 | 2               | 0.3 | 4                  | 0.5 | 1               | 0.1 | NR              |       | 1               | 100.0 |
| Argentina              | 20        | 1.1 | 19              | 1.0 | 19                 | 1.0 | 18              | 1.0 | 1               | 25.0  | 1               | 25.0  |
| High HDI               | 109       | 0.8 | 160             | 1.2 | 101                | 0.8 | 154             | 1.2 | 8               | 40.0  | 6               | 30.0  |
| Mexico                 | 44        | 1.3 | 43              | 1.3 | 41                 | 1.3 | 43              | 1.3 | 3               | 60.0  | NR              |       |
| Lebanon                | 7         | 0.9 | 15              | 1.9 | 7                  | 0.9 | 14              | 1.7 | NR              |       | 1               | 100.0 |
| Peru                   | 30        | 1.1 | 39              | 1.4 | 27                 | 1.0 | 36              | 1.3 | 3               | 37.5  | 3               | 37.5  |
| Brazil                 | 4         | 0.3 | 12              | 0.9 | 4                  | 0.3 | 12              | 0.9 | NR              |       | NR              |       |
| Ecuador                | 4         | 0.2 | 29              | 1.2 | 4                  | 0.2 | 27              | 1.1 | NR              |       | 2               | 66.7  |
| Sri Lanka              | 20        | 0.8 | 22              | 0.9 | 18                 | 0.7 | 22              | 0.9 | 2               | 100.0 | NR              | 0.0   |
| Medium HDI             | 80        | 0.7 | 176             | 1.6 | 74                 | 0.7 | 160             | 1.4 | 6               | 15.4  | 16              | 41.0  |
| Jordan                 | 2         | 0.8 | 4               | 1.6 | 2                  | 0.8 | 4               | 1.6 | NR              |       | NR              |       |
| China                  | 8         | 0.6 | 4               | 0.3 | 8                  | 0.6 | 4               | 0.3 | NR              |       | NR              |       |
| Thailand               | 9         | 0.9 | 2               | 0.2 | 9                  | 0.9 | 2               | 0.2 | NR              |       | NR              |       |
| Mongolia               | 10        | 1.4 | 10              | 1.4 | 9                  | 1.3 | 10              | 1.4 | 1               | 100.0 | NR              |       |
| OPT                    | 1         | 0.6 | 3               | 1.8 | 1                  | 0.6 | 3               | 1.8 | NR              |       | NR              |       |
| Paraguay               | 5         | 0.7 | 12              | 1.6 | 5                  | 0.7 | 12              | 1.6 | NR              |       | NR              |       |
| Philippines            | 2         | 0.2 | 25              | 2.2 | 2                  | 0.2 | 24              | 2.1 | NR              |       | 1               | 25.0  |
| Vietnam                | 7         | 0.3 | NR              |     | 6                  | 0.3 | NR              |     | 1               | 100.0 | NR              |       |
| Nicaragua              | 6         | 0.7 | 8               | 0.9 | 5                  | 0.6 | 8               | 0.9 | 1               | 50.0  | NR              |       |
| India                  | 29        | 1.1 | 103             | 3.8 | 26                 | 1.0 | 88              | 3.3 | 3               | 13.6  | 15              | 68.2  |
| Cambodia               | 1         | 0.6 | 5               | 2.8 | 1                  | 0.6 | 5               | 2.9 | NR              |       | NR              |       |
| Low HDI                | 163       | 1.6 | 435             | 4.3 | 122                | 1.2 | 375             | 3.7 | 41              | 39.8  | 60              | 58.3  |
| Kenya                  | 14        | 0.6 | 95              | 4.2 | 10                 | 0.4 | 80              | 3.5 | 4               | 21.1  | 15              | 78.9  |
| Pakistan               | 28        | 1.1 | 108             | 4.2 | 22                 | 0.9 | 94              | 3.7 | 6               | 40.0  | 14              | 93.3  |
| Angola                 | 11        | 1.9 | 49              | 8.4 | 5                  | 0.9 | 43              | 7.5 | 6               | 54.5  | 6               | 54.5  |
| Nigeria                | 24        | 2.5 | 22              | 2.3 | 18                 | 1.9 | 19              | 2.0 | 6               | 66.7  | 3               | 33.3  |
| Nepal                  | 2         | 0.3 | 21              | 3.5 | 1                  | 0.2 | 19              | 3.2 | 1               | 33.3  | 2               | 66.7  |
| Uganda                 | 16        | 1.8 | 36              | 4.0 | 11                 | 1.3 | 29              | 3.3 | 5               | 33.3  | 7               | 46.7  |
| Afghanistan            | 15        | 2.1 | 24              | 3.4 | 13                 | 1.9 | 23              | 3.3 | 2               | 66.7  | 1               | 33.3  |
| DRC                    | 19        | 1.8 | 49              | 4.6 | 11                 | 1.0 | 39              | 3.7 | 8               | 47.1  | 10              | 58.8  |
| Niger                  | 34        | 7.6 | 31              | 6.9 | 31                 | 7.1 | 29              | 6.6 | 3               | 27.3  | 2               | 18.2  |
| All regions            | 382       | 1.0 | 792             | 2.1 | 324                | 0.9 | 708             | 1.9 | 58              | 34.1  | 84              | 49.4  |

CS, caesarean section; DRC, Democratic Republic of Congo; HDI, Human Development Index; NR, not reported; OPT, Occupied Palestinian Territory; SMO, Severe maternal outcomes, maternal near miss and /or death; Perinatal death, fresh stillbirth and intra-hospital early neonatal mortality.

Supplementary Table S5. Incidence of maternal and perinatal adverse outcomes among women with prior caesarean section who had uterine rupture in the current pregnancy by HDI group

| Adverse outcomes                | HDI groups       |      |          |      |           |      | P value |
|---------------------------------|------------------|------|----------|------|-----------|------|---------|
|                                 | Very high & high |      | Medium   |      | Low       |      |         |
|                                 | n                | %    | n        | %    | n         | %    |         |
| Number of uterine rupture       | 28 (0.2)         |      | 39 (0.4) |      | 103 (1.0) |      |         |
| Adverse maternal outcomes       |                  |      |          |      |           |      |         |
| Maternal near miss (n=53)       | 10               | 35.7 | 6        | 15.8 | 37        | 35.9 | 0.053   |
| Maternal death* (n=5)           | 1                | 3.6  | 0        | 0    | 4         | 3.9  | 1.000   |
| Severe maternal outcomes (n=58) | 11               | 39.3 | 6        | 15.8 | 41        | 39.8 | 0.019   |
| Adverse perinatal outcomes      |                  |      |          |      |           |      |         |
| Fresh stillbirth (n=73)         | 4                | 14.3 | 13       | 34.2 | 56        | 54.4 | <0.001  |
| IHENM (n=11)                    | 4                | 14.3 | 3        | 7.9  | 4         | 3.9  | 0.110   |
| Perinatal death (n=84)          | 8                | 28.6 | 16       | 42.1 | 60        | 58.3 | 0.010   |

HDI, Human Development Index; Maternal death, death up to the 8th postpartum day or before hospital discharge; Severe maternal outcomes, maternal near miss and/or death; IHENM, Intra-hospital early neonatal mortality, death within 7 days after birth or before hospital discharge; Perinatal death, fresh stillbirth and intra-hospital early neonatal mortality. Chi-square test or Fisher's exact test were used as appropriate. \*Comparison was made between the very high-/high-HDI groups and the low-HDI group.

Supplementary Table S6. Number of women with pregnancy complications and number and proportion of women who were referred from other hospitals

|                      | All women |      | No uterine rupture |      | Uterine rupture |      | P value |
|----------------------|-----------|------|--------------------|------|-----------------|------|---------|
|                      | n/N       | %    | n/N                | %    | n/N             | %    |         |
| Overall              | 357/3543  | 10.1 | 327/3386           | 9.7  | 30/157          | 19.1 | <0.001  |
| Very high & high HDI | 171/1507  | 11.4 | 167/1485           | 11.3 | 4/22            | 18.2 | 0.303   |
| Medium HDI           | 32/979    | 3.3  | 29/942             | 3.8  | 3/37            | 8.1  | 0.116   |
| Low HDI              | 154/1057  | 14.6 | 131/959            | 13.7 | 23/98           | 23.5 | 0.009   |

In the data set, hospital referrals from other hospitals were available only for all women who had any pregnancy-related complications. Fisher's exact tests or chi-square tests were performed whenever appropriate.

Supplementary Table S7. Proportion of women with preterm deliveries (<37 weeks) in women with prior caesarean section who had uterine rupture in the current pregnancy, by onset of labour and Human Development Index group

|             | All groups |      | HDI groups       |      |        |      |        |      |
|-------------|------------|------|------------------|------|--------|------|--------|------|
|             |            |      | Very high & high |      | Medium |      | Low    |      |
|             | n/N        | %    | n/N              | %    | n/N    | %    | n/N    | %    |
| Spontaneous | 25/113     | 22.1 | 6/13             | 46.2 | 7/26   | 26.9 | 12/74  | 16.2 |
| Induced     | 5/10       | 50.0 | 3/4              | 75.0 | 1/2    | 50.0 | 1/4    | 25.0 |
| No labour   | 18/45      | 40.0 | 5/11             | 45.5 | 3/11   | 27.3 | 10/23  | 43.5 |
| All         | 48/168     | 28.6 | 14/28            | 50.0 | 11/39  | 28.2 | 23/101 | 22.8 |

HDI, Human Development Index
